# Supplementary material for: Thiolated poly(aspartic acid)-functionalized two-dimensional MoS2, chitosan and bismuth film as a sensor platform for cadmium ion detection
Source: Royal Society of Chemistry journal article supplement (doi:10.1039/d0ra06197b), 2020-01-01
Supplement: d0ra06197b1.pdf [file d0ra06197b1.pdf]

# Thiolated Poly(aspartic acid)-Functionalized Two-Dimensional MoS<sub>2</sub>, Chitosan and Bismuth Film as Sensor Platform for Cadmium Ions Detection

*Qiang Cao*<sup>1, 2‡</sup>, *Yushi Xiao*<sup>1, 2‡</sup>, *Rong Huang*<sup>1, 3‡</sup>, *Na Liu*<sup>1, 2</sup>, *Hai Chi*<sup>4</sup>, *Zhengde Lin*<sup>5</sup>, *Chi-Hsien Huang*<sup>6</sup>, *Gang Han*<sup>1</sup>, *Lidong Wu*<sup>1\*</sup>

1. Key Laboratory of Control of Quality and Safety for Aquatic Products, Chinese Academy of Fishery Sciences, Beijing, 100141, China
2. Shanghai Ocean University, Shanghai 201306, China
3. Beijing Engineering and Technology Research Center of Food Additives, Beijing Technology and Business University (BTBU), Beijing, 100048, China
4. East China Sea Fisheries Research Institute, Chinese Academy of Fishery Sciences, Shanghai, 201306, China
5. Ningbo Institute of Materials Technology and Engineering, Chinese Academy of Sciences, Ningbo, 315201, China
6. Department of Materials Engineering, Mingchi University of Technology, 243303, Taiwan

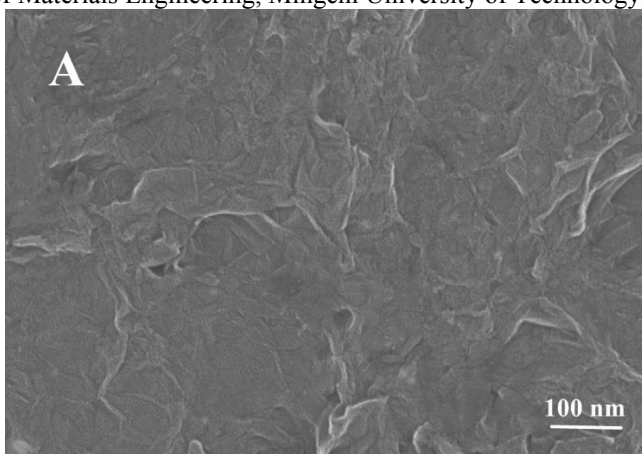

---

‡Authors equally contribution to this work.

\*Corresponding author. Tel/Fax: 86-10-68690712; E-mail:

wulidong19849510@hotmail.com

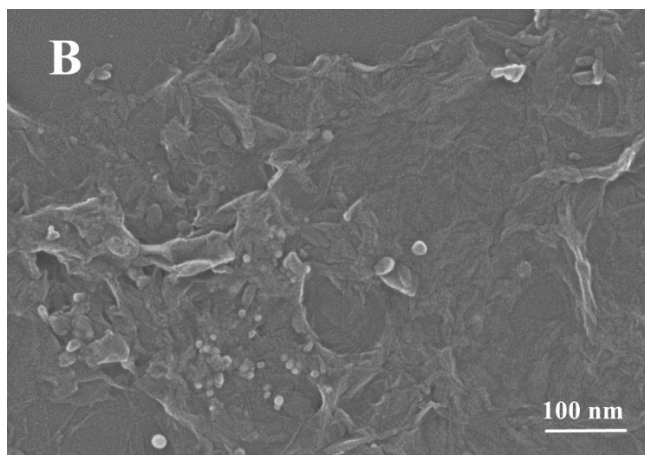

Fig. S1. SEM image of (A) the TPA functionalized MoS<sub>2</sub>, and (B) the TPA-MoS<sub>2</sub> with bismuth and cadmium.

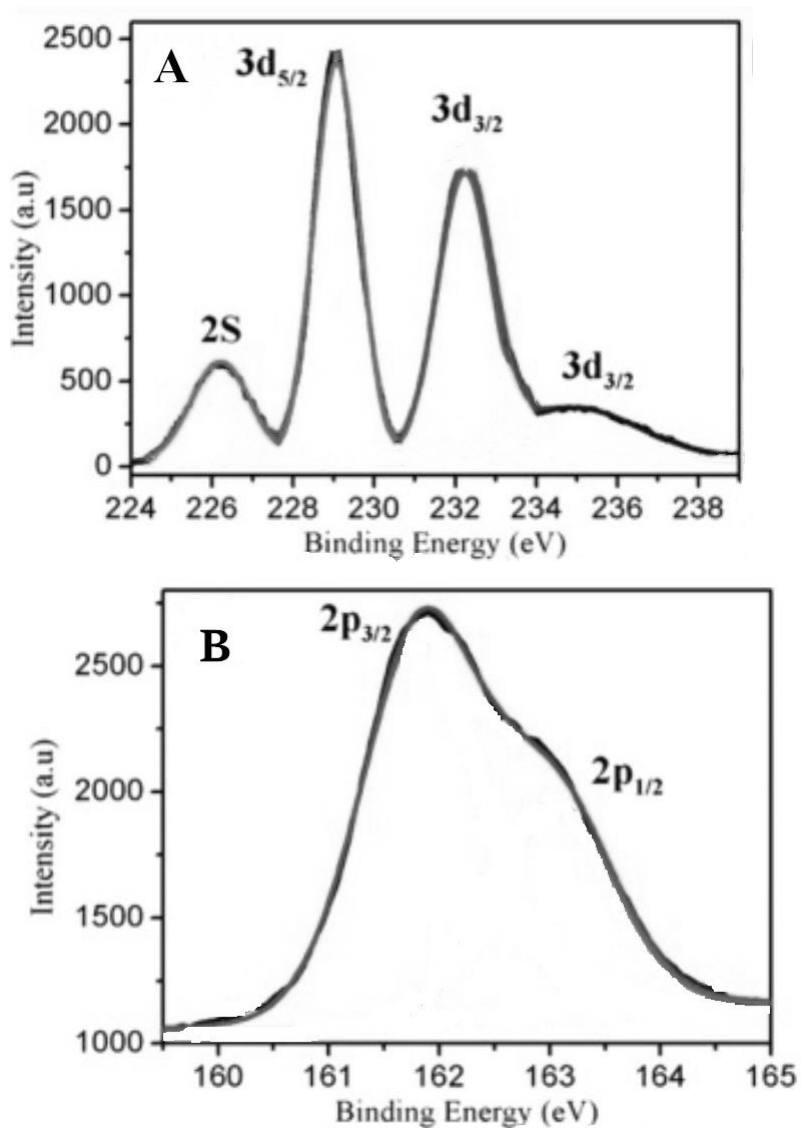

Fig. S2. XPS image of (A) the MoS<sub>2</sub>, and (B) the TPA-MoS<sub>2</sub> with bismuth and cadmium.
